# Supplementary material for: A salicylaldehyde benzoyl hydrazone based near-infrared probe for copper(ii) and its bioimaging applications
Source: Royal Society of Chemistry journal article supplement (doi:10.1039/d1ra08616b), 2022-01-01
Supplement: d1ra08616b1.pdf [file d1ra08616b1.pdf]

## Supporting Information

### **A salicylaldehyde benzoyl hydrazone based near-infrared probe for copper(II) and its bioimaging applications**

*Jie Zhao,<sup>†a</sup> Yue-yuan Wang,<sup>†a</sup> Wen-ling Chen,<sup>b</sup> Guang-shu Hao,<sup>a</sup> Jian-ping Sun,<sup>a</sup> Qing-fang Shi,<sup>a</sup>  
Fang Tian<sup>\*a</sup> and Run-tian Ma<sup>\*b</sup>*

<sup>a</sup> Gansu Provincial Maternity and Childcare Hospital, Lanzhou 730000, Gansu Province, P. R. China, E-mail: tianfang720203@163.com

<sup>b</sup> College of Science, Gansu Agricultural University, Lanzhou 730000, Gansu Province, P. R. China, E-mail: mart@gsau.edu.cn

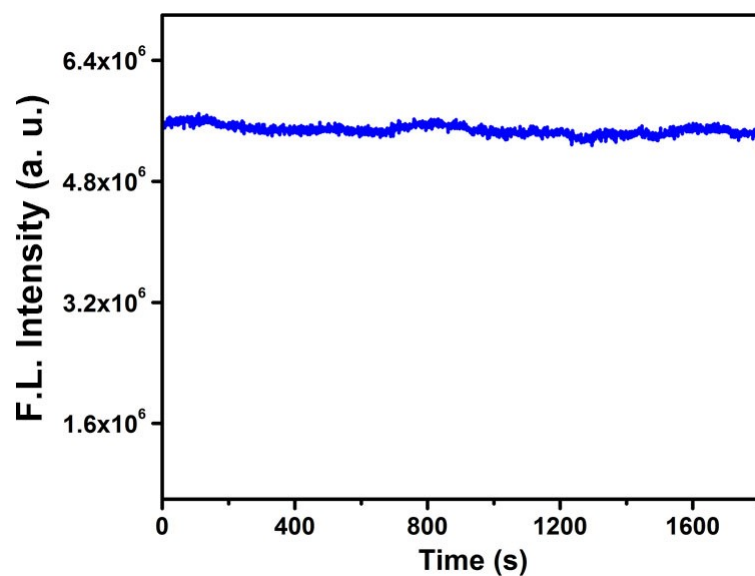

**Figure S1** Time-dependent fluorescence spectra of CySBH (5 μM).

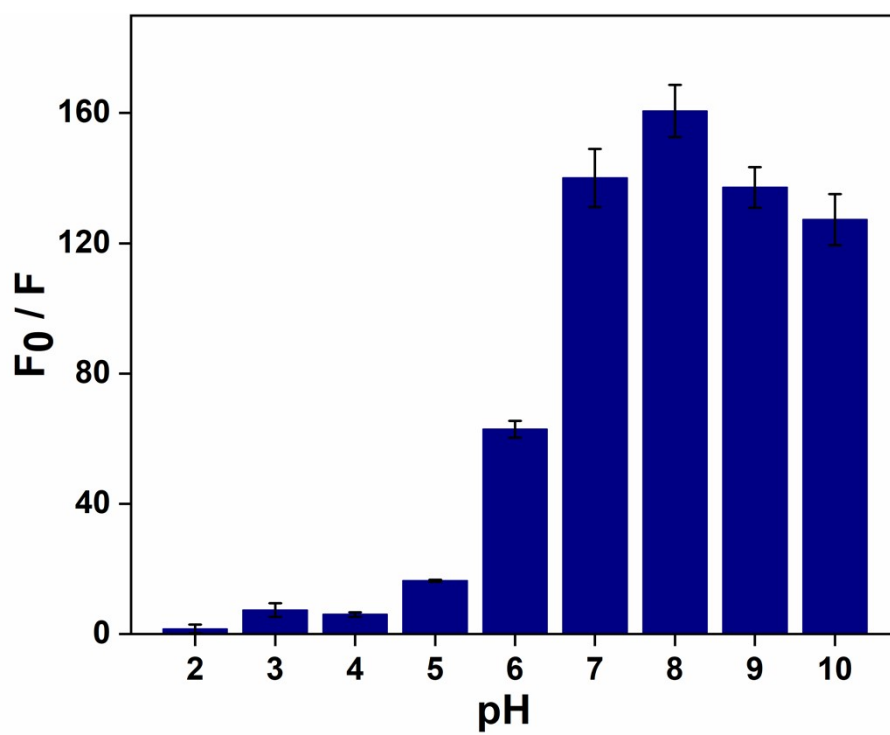

**Figure S2** Effect of pH on the fluorescence intensities of CySBH. F<sub>0</sub> and F are the fluorescence intensities of CySBH in the absence and presence of Cu<sup>2+</sup> in different pH, respectively.

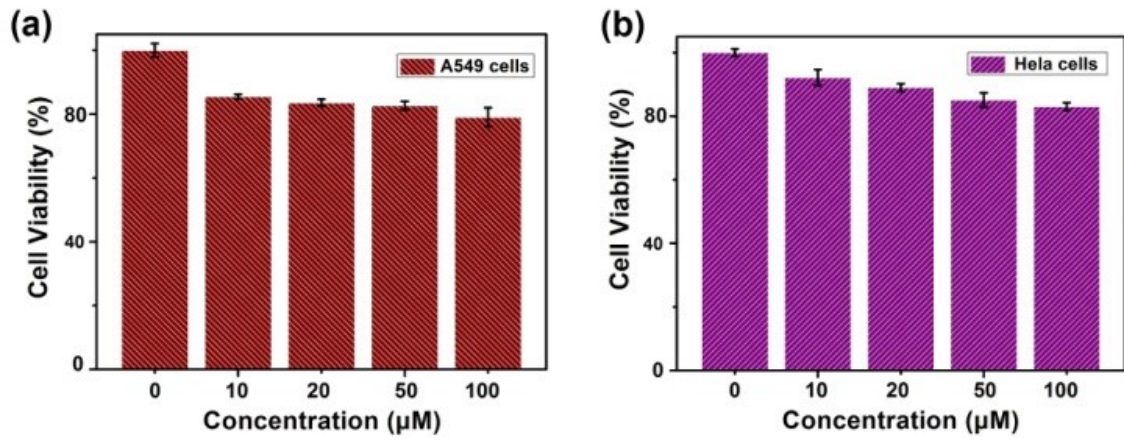

**Figure S3** Cell viability of A 549 (a) and HeLa cells (b) incubated with different amounts of probe CySBH for 24 h.

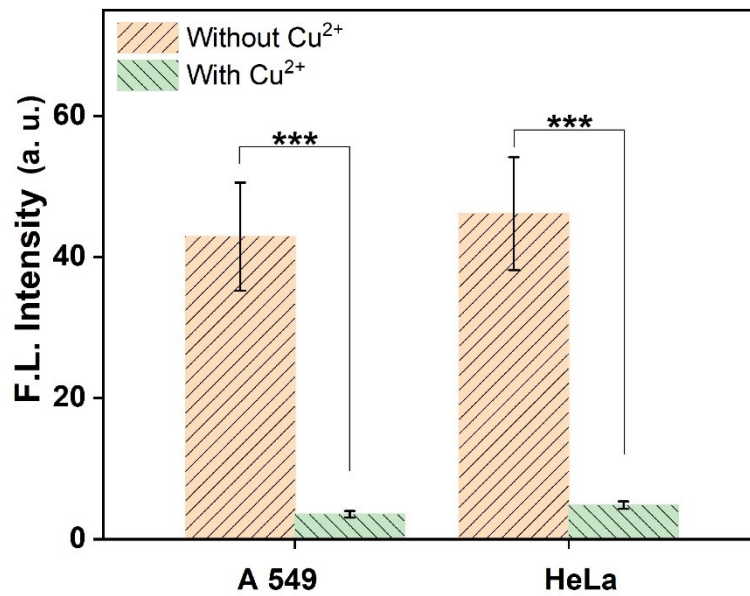

**Figure S4** Fluorescence intensities analyses CySBH (5 μM) in A549 and HeLa cells incubated with (green bar) and without (yellow bar) Cu<sup>2+</sup>. (\*P < 0.05, \*\*P < 0.01, and \*\*\*P < 0.001).

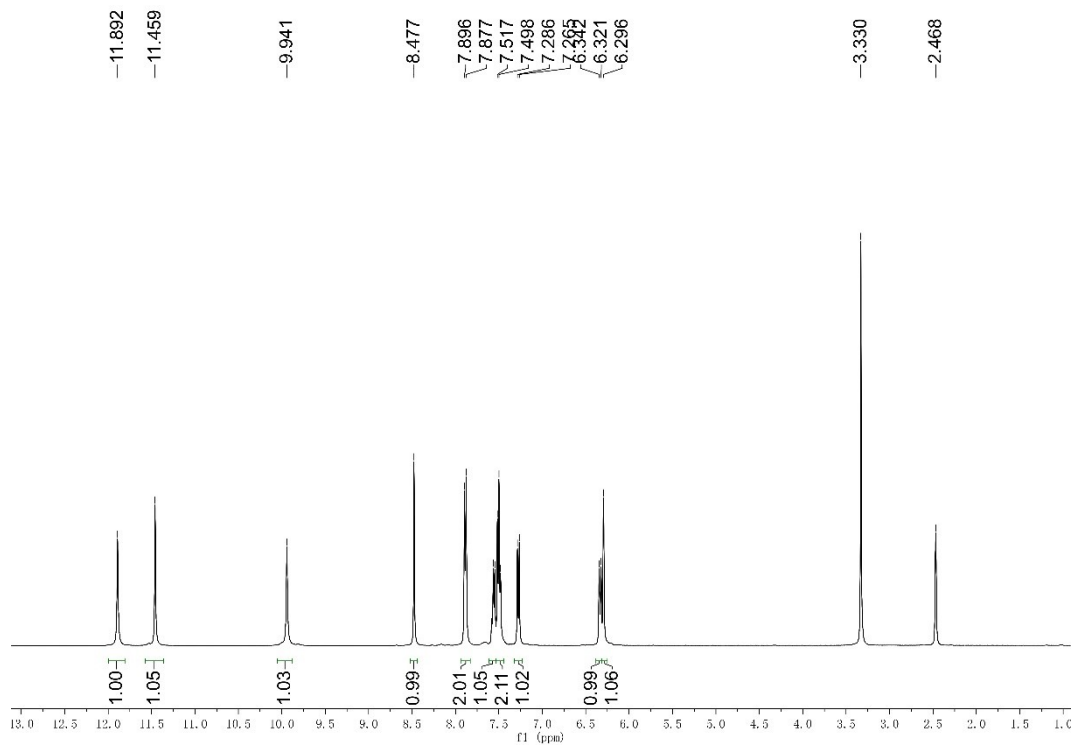

Figure S5  $^1\text{H}$  NMR spectrum of compound 4.

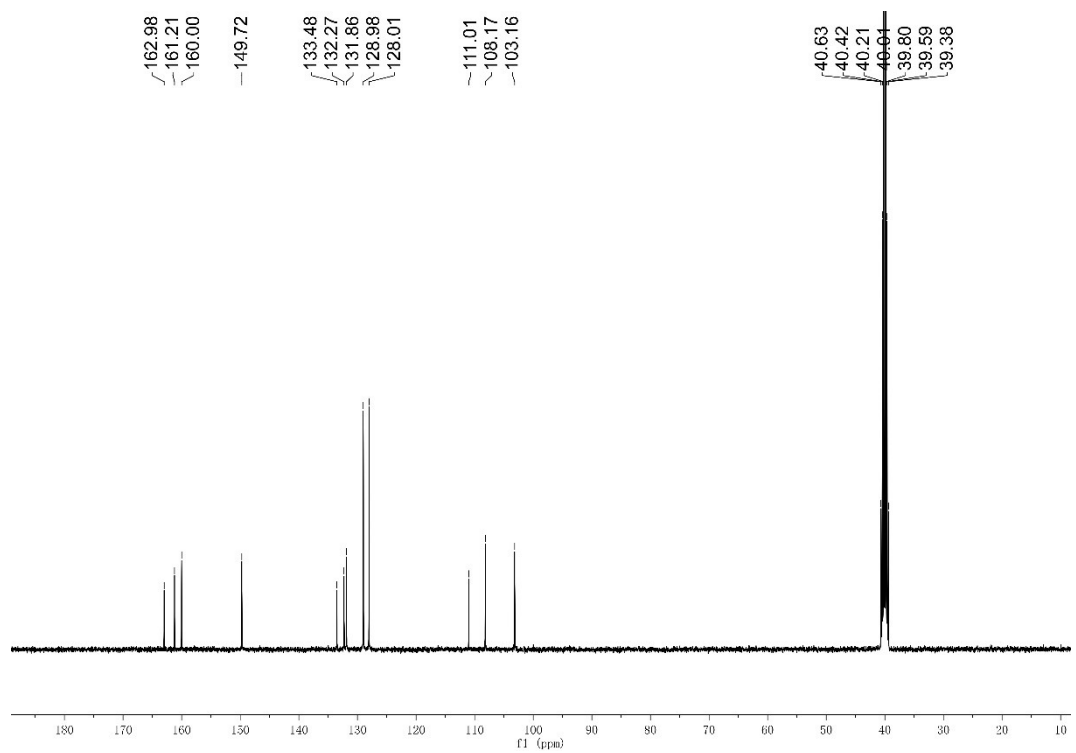

Figure S6  $^{13}\text{C}$  NMR spectrum of compound 4.

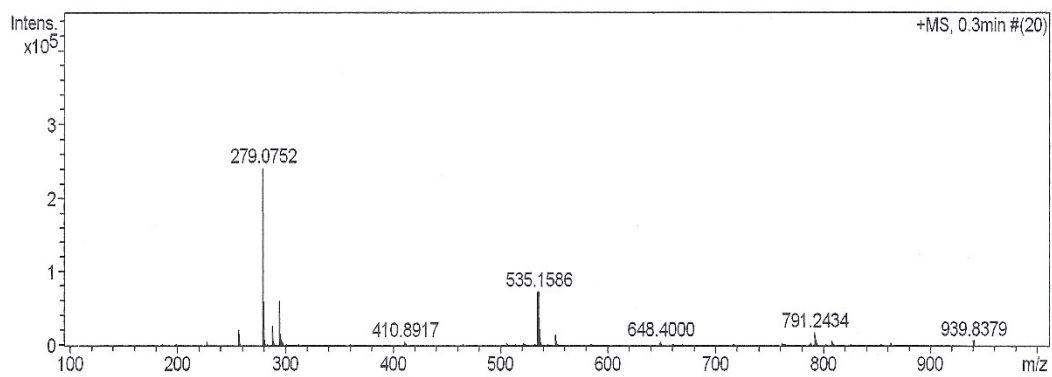

Figure S7 HR-ESIMS spectrum of compound 4.

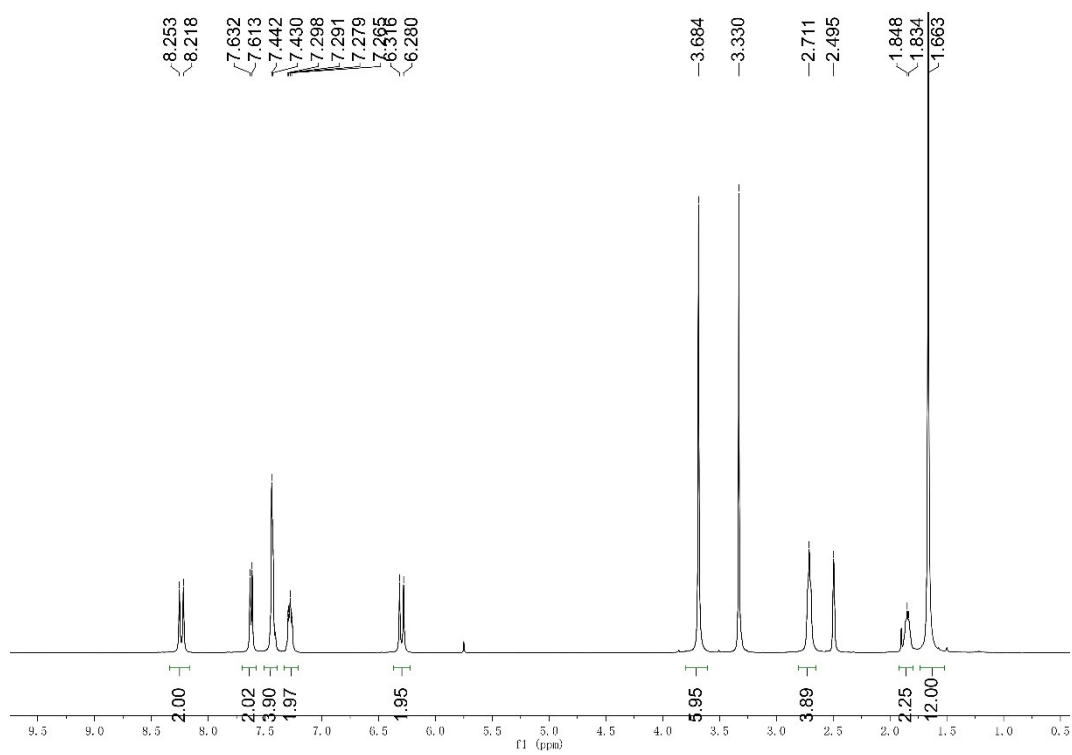

Figure S8  $^1\text{H}$  NMR spectrum of compound 4.

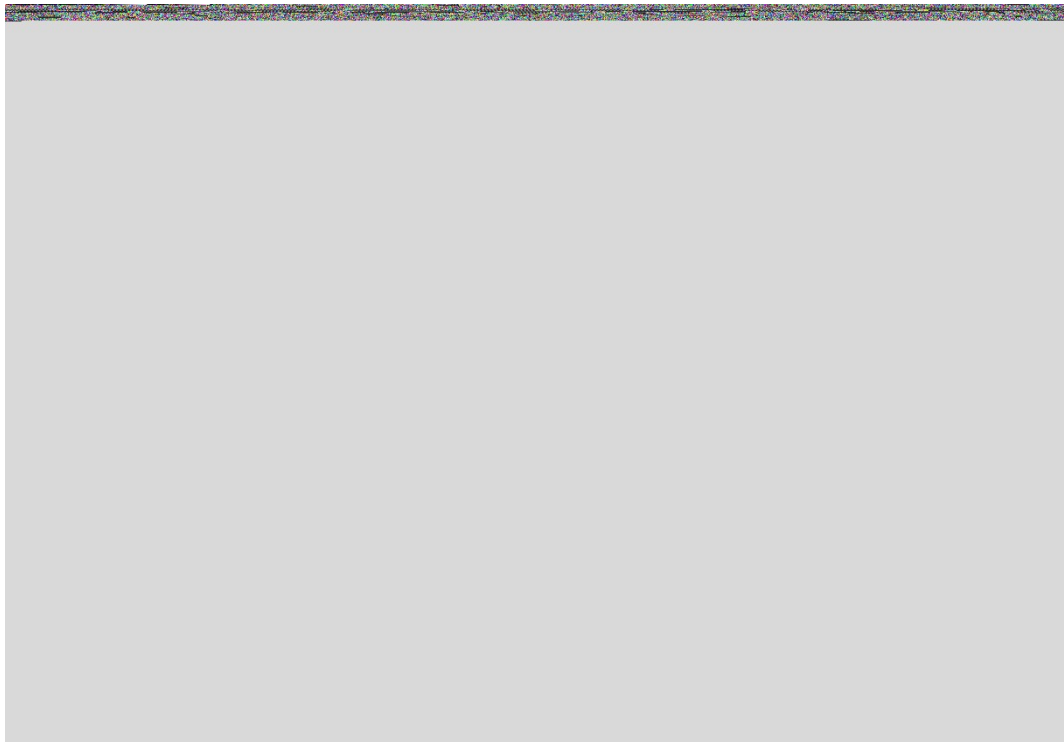

**Figure S9**  $^{13}\text{C}$  NMR spectrum of compound **IR**.

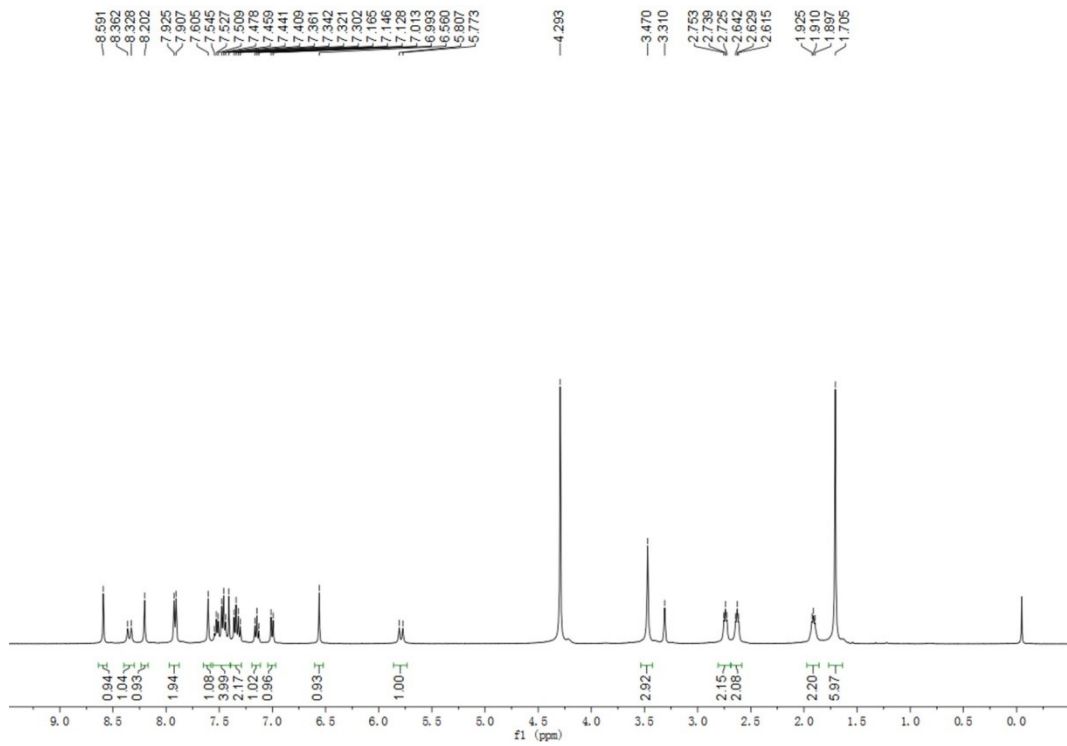

**Figure S10**  $^1\text{H}$  NMR spectrum of probe **CySBH**.

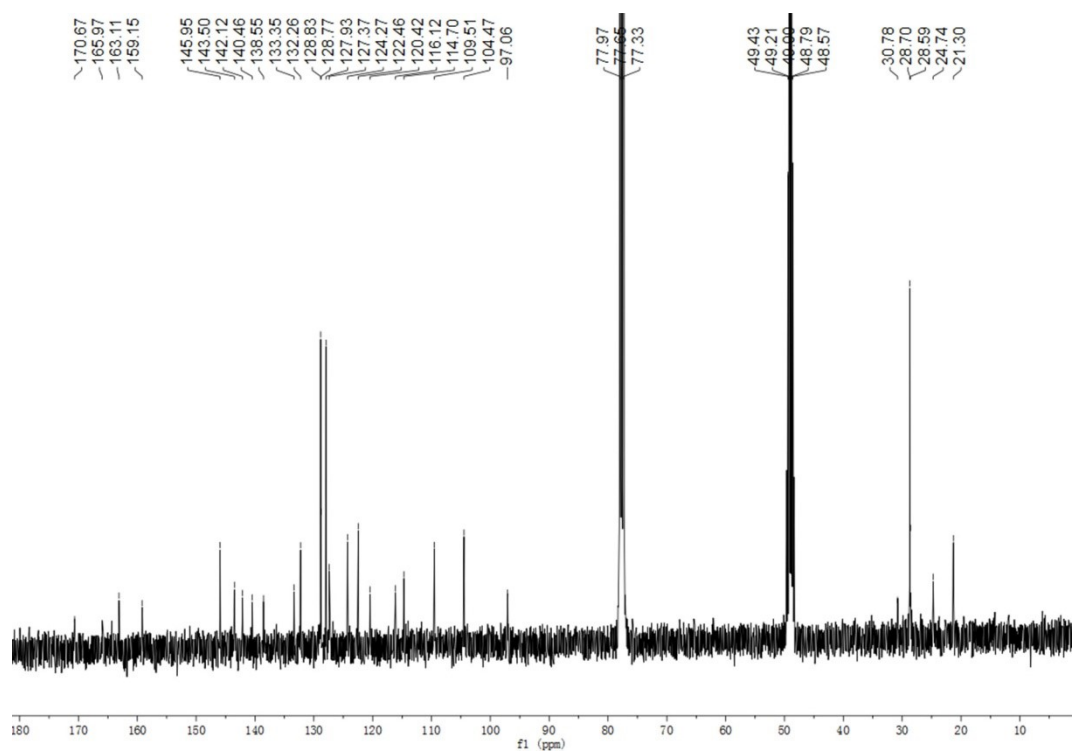

**Figure S11**  $^{13}\text{C}$  NMR spectrum of probe CySBH.

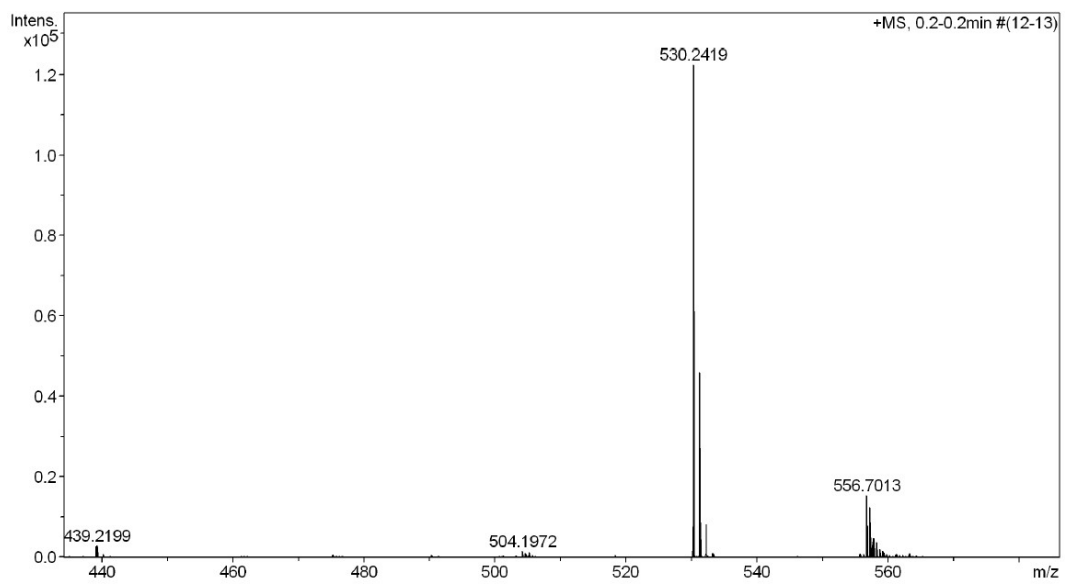

**Figure S12** HR-ESIMS spectrum of probe CySBH.

**Table S1 Comparison of CySBH with some relevant reported copper(II) probe.**

| Probe                                                                               | $\lambda_{ex}/\lambda_{em}$<br>(nm) | LOD<br>(nM) | Selectivity<br>cations | Time   | Ref.     |
|-------------------------------------------------------------------------------------|-------------------------------------|-------------|------------------------|--------|----------|
| 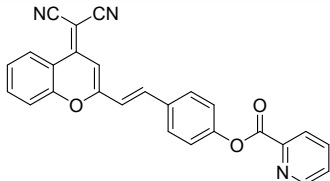   | 560/700                             | 25.4        | 11                     | 20 min | 1 (2021) |
|    | 542/589                             | 100         | 12                     | NA     | 2 (2021) |
|    | 650/696                             | 200         | 16                     | NA     | 3 (2020) |
|   | 350/523                             | 19.7        | 13                     | 20 min | 4 (2020) |
|  | 656/669                             | 1.93        | 13                     | 40 s   | 5 (2020) |
|  | 365/460                             | 157         | 20                     | 20 min | 6 (2020) |
|  | 647/718                             | 47          | 16                     | NA     | 7 (2020) |



|                                                                                     |         |      |    |       |           |
|-------------------------------------------------------------------------------------|---------|------|----|-------|-----------|
| 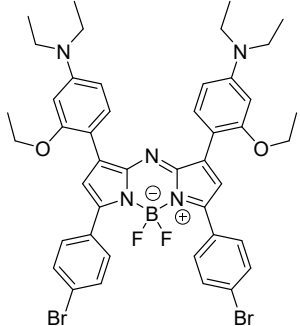   | 663/749 | 350  | 12 | NA    | 8 (2020)  |
|    | 365/466 | 660  | 11 | NA    | 9 (2020)  |
|    | 370/476 | NA   | 13 | 100 s | 10 (2020) |
|   | 460/519 | NA   | 13 | 50 s  | 10 (2020) |
|  | 449/505 | 60   | 14 | NA    | 11 (2020) |
|  | 711/744 | 28.4 | 17 | 1.8 s | This work |

## References

1. Z. Li, Y. Xu, H. Xu, M. Cui, T. Liu, X. Ren, J. Sun, D. Deng, Y. Gu and P. Wang, A dicyanomethylene-4H-pyran-based fluorescence probe with high selectivity and sensitivity for detecting copper (II) and its bioimaging in living cells and tissue, *Spectrochim. Acta A*, 2021, **244**, 118819
2. Y. Song, J. Tao, Y. Wang, Z. Cai, X. Fang, S. Wang and H. Xu, A novel dual-responsive fluorescent probe for the detection of copper(II) and nickel(II) based on BODIPY derivatives, *Inorganica Chimica Acta*, 2021, **516**, 120099
3. Z. Aydin, B. Yan, Y. Wei and Maolin Guo, A novel near-infrared turn-on and ratiometric fluorescent probe capable of copper(II) ion determination in living cells, *Chem. Commun.*, 2020, **56**, 6043-6046
4. M. Li, H. Chen, X. Liu, N. Zhang, Q. Sun and K. Zheng, A selective and sensitive sequential ratio/"turn-off" dual mode fluorescent chemosensor for detection of copper ions in aqueous solution and serum, *Inorganica Chimica Acta*, 2020, **511**, 119825
5. Y. Shen, W. Zheng, Y. Yao, D. Wang, G. Lv and C. Li, Phenoxazine-based near-infrared fluorescent probes for the specific detection of copper (II) ions in living cells, *Chem Asian J.*, 2020, **15**, 2864–2867
6. J. Yin, Z. Wang, F. Zhao, H. Yang, M. Li and Y. Yang, A novel dual functional pyrene-based turn-on fluorescent probe for hypochlorite and copper (II) ion detection and bioimaging applications, *Spectrochim. Acta A*, 2020, **239**, 118470
7. O. Hanmeng, N. Chailek, A. Charoenpanich, P. Phuekvilai, N. Yookongkaew, N. Sanmanee, J. Sirirak, P. Swanglap and N. Wanichacheva, Cu<sup>2+</sup>-selective NIR fluorescence sensor based on heptamethine cyanine in aqueous media and its application, *Spectrochim. Acta A*, 2020, **240**, 11806
8. Y. Gawale, S. Mangalath, N. Adarsh, J. Joseph, D. Ramaiah and N. Sekar, Novel Aza-BODIPY based turn on selective and sensitive probe for on-site visual detection of bivalent copper ions, *Dyes Pigm.*, 2019, **171**, 207684
9. S. M. Hossainm, V. Prakashm, P. Mamidi, S. Chattopadhyay and A. K. Singh, Pyrene-appended bipyridine hydrazone ligand as a turn-on sensor for Cu<sup>2+</sup> and its bioimaging application, *RSC Adv.*, 2020, **10**, 3646
10. H. Chen, P. Yang, Y. Li, L. Zhang, F. Ding, X. He, J. Shen, Insight into triphenylamine and coumarin serving as copper (II) sensors with "OFF" strategy and for bio-imaging in living cells, *Spectrochim. Acta A*, 2020, **224**, 117384
11. S. Li, D. Cao, X. Meng, Z. Hu, Z. Li, C. Yuan, T. Zhou, X. Han and W. Ma, A novel fluorescent chemosensor based on coumarin and quinolinylnbenzothiazole for sequential recognition of Cu<sup>2+</sup> and PPI and its applicability in live cell imaging, *Spectrochim. Acta A*, 2020, **230**, 118022
